# Supplementary material
Source: ML conference proceedings conference paper supplement (https://proceedings.neurips.cc/paper_files/paper/2020/hash/b096577e264d1ebd6b41041f392eec23-Abstract.html)
Supplement: Supplementary file [file b096577e264d1ebd6b41041f392eec23-Supplemental.zip]

---

# Supplementary Materials for “Boosting First-Order Methods by Shifting Objective: New Schemes with Faster Worst-Case Rates”

---

## A Technical lemmas with proofs

**Lemma 1** (Shifted mirror descent lemma). *Given a gradient estimator  $\mathcal{G}_y$ , vectors  $z^+, z^-, y \in \mathbb{R}^d$ , fix the updating rule  $z^+ = \arg \min_x \{ \langle \mathcal{G}_y, x \rangle + \alpha/2 \|x - z^-\|^2 + \mu/2 \|x - y\|^2 \}$ . Suppose that we have a shifted gradient estimator  $\mathcal{H}_y$  satisfying the relation  $\mathcal{H}_y = \mathcal{G}_y - \mu(y - x^*)$ , it holds that*

$$\langle \mathcal{H}_y, z^- - x^* \rangle = \frac{\alpha}{2} \left( \|z^- - x^*\|^2 - \left(1 + \frac{\mu}{\alpha}\right)^2 \|z^+ - x^*\|^2 \right) + \frac{1}{2\alpha} \|\mathcal{H}_y\|^2.$$

*Proof.* Using the optimality condition,

$$\begin{aligned} \mathcal{G}_y + \alpha(z^+ - z^-) + \mu(z^+ - y) &= \mathbf{0}, \\ \mathcal{H}_y + \alpha(z^+ - z^-) + \mu(z^+ - x^*) &= \mathbf{0}, \\ (\alpha + \mu)(z^+ - x^*) &= \alpha(z^- - x^*) - \mathcal{H}_y, \\ (\alpha + \mu)^2 \|z^+ - x^*\|^2 &= \alpha^2 \|z^- - x^*\|^2 - 2\alpha \langle \mathcal{H}_y, z^- - x^* \rangle + \|\mathcal{H}_y\|^2. \end{aligned}$$

Re-arranging the last equality completes the proof.  $\square$

**Lemma 2** (Shifted firm non-expansiveness). *Given relations  $z^+ = \text{prox}_i^\alpha(z^-)$  and  $y^+ = \text{prox}_i^\alpha(y^-)$ , it holds that*

$$\frac{1}{\alpha^2} \left( 1 + \frac{2(\alpha + \mu)}{L - \mu} \right) \|\nabla h_i(z^+) - \nabla h_i(y^+)\|^2 + \left( 1 + \frac{\mu}{\alpha} \right)^2 \|z^+ - y^+\|^2 \leq \|z^- - y^-\|^2.$$

*Proof.* Based on the first-order optimality condition and the definition of  $h_i$ ,

$$\begin{aligned} \nabla f_i(z^+) + \alpha(z^+ - z^-) &= \mathbf{0}, & \nabla f_i(y^+) + \alpha(y^+ - y^-) &= \mathbf{0}, \\ \nabla h_i(z^+) + \nabla f_i(x^*) + \mu(z^+ - x^*) + \alpha(z^+ - z^-) &= \mathbf{0}, \\ \nabla h_i(y^+) + \nabla f_i(x^*) + \mu(y^+ - x^*) + \alpha(y^+ - y^-) &= \mathbf{0}. \end{aligned}$$

Subtract the last two equalities,

$$(\alpha + \mu)(z^+ - y^+) = \alpha(z^- - y^-) - (\nabla h_i(z^+) - \nabla h_i(y^+)), \quad (4)$$

which implies

$$\begin{aligned} (\alpha + \mu)^2 \|z^+ - y^+\|^2 &= \alpha^2 \|z^- - y^-\|^2 - 2\alpha \langle \nabla h_i(z^+) - \nabla h_i(y^+), z^- - y^- \rangle \\ &\quad + \|\nabla h_i(z^+) - \nabla h_i(y^+)\|^2. \end{aligned} \quad (5)$$

Based on the interpolation condition of  $h_i$ , we have

$$\langle \nabla h_i(z^+) - \nabla h_i(y^+), z^+ - y^+ \rangle \geq \frac{1}{L - \mu} \|\nabla h_i(z^+) - \nabla h_i(y^+)\|^2.$$

Together with (4), it holds that

$$\langle \nabla h_i(z^+) - \nabla h_i(y^+), z^- - y^- \rangle \geq \frac{1}{\alpha} \left( 1 + \frac{\alpha + \mu}{L - \mu} \right) \|\nabla h_i(z^+) - \nabla h_i(y^+)\|^2.$$

It remains to use this bound in (5).  $\square$

Forming convex combination between vector sequences is a common technique in designing accelerated methods (e.g., [4, 25, 16, 1]). From an analytical perspective, convex combination facilitates building a contraction between function values and the coefficient directly controls the contraction ratio, which is summarized in the following lemma. Unlike previous works, we allow a residual term  $\mathcal{R}$  in the convex combination.

**Lemma 3** (Function-value contraction). *Given a continuously differentiable and convex function  $f$ , vectors  $x^+, x^-, z, \mathcal{R} \in \mathbb{R}^d$  and scalar  $\tau \in ]0, 1[$ , if  $x^+ = \tau z + (1 - \tau)x^- + \mathcal{R}$ , it satisfies that*

$$f(x^+) - f(x^*) \leq (1 - \tau)(f(x^-) - f(x^*)) + \langle \nabla f(x^+), \mathcal{R} \rangle + \tau \langle \nabla f(x^+), z - x^* \rangle.$$

*Proof.* Using convexity twice,

$$\begin{aligned} f(x^+) - f(x^*) &\leq \langle \nabla f(x^+), x^+ - x^* \rangle \\ &= \langle \nabla f(x^+), x^+ - z \rangle + \langle \nabla f(x^+), z - x^* \rangle \\ &= \frac{1 - \tau}{\tau} \langle \nabla f(x^+), x^- - x^+ \rangle + \frac{1}{\tau} \langle \nabla f(x^+), \mathcal{R} \rangle + \langle \nabla f(x^+), z - x^* \rangle \\ &\leq \frac{1 - \tau}{\tau} (f(x^-) - f(x^+)) + \frac{1}{\tau} \langle \nabla f(x^+), \mathcal{R} \rangle + \langle \nabla f(x^+), z - x^* \rangle. \end{aligned}$$

Re-arranging this inequality completes the proof.  $\square$

This simple trick (with  $\mathcal{R} = \mathbf{0}$ ) appears frequently in the proofs of existing accelerated first-order methods. Note that the convexity arguments in this lemma can be strengthened by the interpolation condition or strong convexity if  $f$  satisfies additional assumptions.

## B Proofs for Section 3

### B.1 Generality of the framework of Algorithm 1

First, we show that TM is a parameterization of NAG (Algorithm 5 in Appendix F). Note that TM has the following scheme (the notations follow the ones in [10]):

$$\begin{aligned} x_{k+1} &= x_k + \beta(x_k - x_{k-1}) - \alpha \nabla f(y_k), \\ y_{k+1} &= x_{k+1} + \gamma(x_{k+1} - x_k), \\ z_{k+1} &= x_{k+1} + \delta(x_{k+1} - x_k). \end{aligned}$$

By casting this scheme into the framework of Algorithm 5, we obtain

$$\begin{aligned} y_k &= \frac{\gamma}{\delta} z_k + \left(1 - \frac{\gamma}{\delta}\right) x_k, \\ z_{k+1} &= \frac{\beta(1 + \delta) - \gamma}{\delta - \gamma} z_k + \frac{\delta - \beta(1 + \delta)}{\delta - \gamma} y_k - \alpha(1 + \delta) \nabla f(y_k), \\ x_{k+1} &= \frac{1}{1 + \delta} z_{k+1} + \frac{\delta}{1 + \delta} x_k. \end{aligned}$$

Substituting the parameter choice of TM, we see that TM is equivalent to choosing  $\alpha = \sqrt{L\mu} - \mu$ ,  $\tau_y = (\sqrt{\kappa} + 1)^{-1}$ ,  $\tau_x = \frac{2\sqrt{\kappa}-1}{\kappa}$  in Algorithm 5. Interestingly, this choice and the choice of NAG (given in Appendix F) only differ in  $\tau_x$ .

Then, we show that Algorithm 5 is an instance of the framework of Algorithm 1. By expanding the convex combinations of sequences  $\{y_k\}$  and  $\{x_k\}$  in Algorithm 5, we can conclude that

$$y_k = \tau_x z_k + (1 - \tau_x) y_{k-1} + \tau_y (1 - \tau_x) (z_k - z_{k-1}).$$

Based on the optimality condition at iteration  $k - 1$ , we have

$$\alpha(z_k - z_{k-1}) = \mu(y_{k-1} - z_k) - \nabla f(y_{k-1}).$$

Now, it is clear that Algorithm 5 is an instance of the framework of Algorithm 1 with the variable-parameter choice (let  $y_{-1} = x_0$ ): at  $k = 0$ ,  $\tau_0^x = \tau_y$ ,  $\tau_0^z = 0$ ; at  $k \geq 1$ ,  $\tau_k^x = \tau_x$ ,  $\tau_k^z = \frac{\tau_y(1 - \tau_x)}{\alpha}$ .

## B.2 Proof of Theorem 1

First, we can introduce a contraction between  $h(y_k)$  and  $h(y_{k-1})$  using Lemma 3. Applying Lemma 3 with  $f = h$  for the recursion  $y_k = \tau_k^x z_k + (1 - \tau_k^x)y_{k-1} + \tau_k^z(\mu(y_{k-1} - z_k) - \nabla f(y_{k-1}))$  and strengthening the convexity arguments by the interpolation condition, we obtain

$$\begin{aligned} h(y_k) &\leq (1 - \tau_k^x)h(y_{k-1}) + \tau_k^z \langle \nabla h(y_k), \mu(y_{k-1} - z_k) - \nabla f(y_{k-1}) \rangle + \tau_k^x \langle \nabla h(y_k), z_k - x^* \rangle \\ &\quad - \frac{\tau_k^x}{2(L - \mu)} \|\nabla h(y_k)\|^2 - \frac{1 - \tau_k^x}{2(L - \mu)} \|\nabla h(y_{k-1}) - \nabla h(y_k)\|^2. \end{aligned}$$

Note that  $\mu(y_{k-1} - z_k) - \nabla f(y_{k-1}) = \mu(x^* - z_k) - \nabla h(y_{k-1})$  by definition, and thus

$$\begin{aligned} h(y_k) &\leq (1 - \tau_k^x)h(y_{k-1}) - \tau_k^z \langle \nabla h(y_k), \nabla h(y_{k-1}) \rangle + (\tau_k^x - \mu\tau_k^z) \langle \nabla h(y_k), z_k - x^* \rangle \\ &\quad - \frac{\tau_k^x}{2(L - \mu)} \|\nabla h(y_k)\|^2 - \frac{1 - \tau_k^x}{2(L - \mu)} \|\nabla h(y_{k-1}) - \nabla h(y_k)\|^2. \end{aligned} \quad (6)$$

Then, to build a contraction between  $\|z_{k+1} - x^*\|^2$  and  $\|z_k - x^*\|^2$ , we apply Lemma 1 with  $\mathcal{G}_y = \nabla f(y_k)$ ,  $\mathcal{H}_y = \nabla h(y_k)$  and  $z^+ = z_{k+1}$ , which gives

$$\langle \nabla h(y_k), z_k - x^* \rangle = \frac{\alpha_k}{2} \left( \|z_k - x^*\|^2 - \left(1 + \frac{\mu}{\alpha_k}\right)^2 \|z_{k+1} - x^*\|^2 \right) + \frac{1}{2\alpha_k} \|\nabla h(y_k)\|^2.$$

Using this relation in (6), expanding and re-arranging the terms, we conclude that

$$\begin{aligned} h(y_k) &- \left( \frac{\tau_k^x - \mu\tau_k^z}{2\alpha_k} - \frac{1}{2(L - \mu)} \right) \|\nabla h(y_k)\|^2 + \frac{\alpha_k(\tau_k^x - \mu\tau_k^z)}{2} \left(1 + \frac{\mu}{\alpha_k}\right)^2 \|z_{k+1} - x^*\|^2 \\ &\leq (1 - \tau_k^x) \left( h(y_{k-1}) - \frac{1}{2(L - \mu)} \|\nabla h(y_{k-1})\|^2 \right) + \frac{\alpha_k(\tau_k^x - \mu\tau_k^z)}{2} \|z_k - x^*\|^2 \\ &\quad + \left( \frac{1 - \tau_k^x}{L - \mu} - \tau_k^z \right) \langle \nabla h(y_k), \nabla h(y_{k-1}) \rangle. \end{aligned}$$

It remains to impose parameter constraints according to the Lyapunov function.

## B.3 Proof of Proposition 1.1

First, we can write the  $k$ th-update of G-TM with constant parameter as

$$\begin{aligned} y_k &= (\tau_x - \tau_z\mu)z_k + (1 - (\tau_x - \tau_z\mu))y_{k-1} - \tau_z\nabla f(y_{k-1}), \\ z_{k+1} &= \frac{\alpha}{\alpha + \mu}z_k + \frac{\mu}{\alpha + \mu}y_k - \frac{1}{\alpha + \mu}\nabla f(y_k). \end{aligned}$$

Substituting the constant parameter choice, we obtain

$$\begin{aligned} y_k &= \frac{2}{\sqrt{\kappa} + 1}z_k + \frac{\sqrt{\kappa} - 1}{\sqrt{\kappa} + 1} \left( y_{k-1} - \frac{1}{L}\nabla f(y_{k-1}) \right), \\ z_{k+1} &= \left(1 - \frac{1}{\sqrt{\kappa}}\right)z_k + \frac{1}{\sqrt{\kappa}}y_k - \frac{1}{\sqrt{L}\mu}\nabla f(y_k). \end{aligned}$$

For the objective function  $f(x) = \frac{1}{2} \left\langle \begin{bmatrix} L & 0 \\ 0 & \mu \end{bmatrix} x, x \right\rangle$ , the update can be further expanded as

$$\begin{aligned} y_k &= \frac{2}{\sqrt{\kappa} + 1}z_k + \begin{bmatrix} 0 & 0 \\ 0 & \frac{(\sqrt{\kappa} - 1)^2}{\kappa} \end{bmatrix} y_{k-1}, \\ z_{k+1} &= \left(1 - \frac{1}{\sqrt{\kappa}}\right)z_k + \begin{bmatrix} -\frac{\kappa - 1}{\sqrt{\kappa}} & 0 \\ 0 & 0 \end{bmatrix} y_k. \end{aligned}$$

Thus,

$$z_{k+1} = \left(1 - \frac{1}{\sqrt{\kappa}}\right) \begin{bmatrix} -1 & 0 \\ 0 & 1 \end{bmatrix} z_k \implies \|z_{k+1} - x^*\|^2 = \left(1 - \frac{1}{\sqrt{\kappa}}\right)^2 \|z_k - x^*\|^2,$$

as desired.

## C Proofs for Section 4

### C.1 Proof of Theorem 2

For simplicity of presentation, we omit the superscript  $s$  for iterates in the same epoch.

Using the trick in Lemma 3 for the recursion  $y_k = \tau_x z_k + (1 - \tau_x) \tilde{x}_s + \tau_z (\mu(\tilde{x}_s - z_k) - \nabla f(\tilde{x}_s))$  and strengthening the convexity arguments by interpolation condition, we obtain

$$h(y_k) \leq \frac{1 - \tau_x}{\tau_x} \langle \nabla h(y_k), \tilde{x}_s - y_k \rangle + \frac{\tau_z}{\tau_x} \langle \nabla h(y_k), \mu(\tilde{x}_s - z_k) - \nabla f(\tilde{x}_s) \rangle + \langle \nabla h(y_k), z_k - x^* \rangle - \frac{1}{2(L - \mu)} \|\nabla h(y_k)\|^2.$$

Note that here the inner product  $\langle \nabla h(y_k), \tilde{x}_s - y_k \rangle$  is not upper bounded as before. This term is preserved to deal with the variance.

By the definition of  $h$ ,  $\mu(\tilde{x}_s - z_k) - \nabla f(\tilde{x}_s) = \mu(x^* - z_k) - \nabla h(\tilde{x}_s)$ . Applying Lemma 1 with  $\mathcal{H}_y = \mathcal{H}_{y_k}^{\text{SVRG}}$ ,  $\mathcal{G}_y = \mathcal{G}_{y_k}^{\text{SVRG}}$ ,  $z^+ = z_{k+1}$  and taking the expectation, we can conclude that

$$\begin{aligned} h(y_k) &\leq \frac{1 - \tau_x}{\tau_x} \langle \nabla h(y_k), \tilde{x}_s - y_k \rangle - \frac{\tau_z}{\tau_x} \langle \nabla h(y_k), \nabla h(\tilde{x}_s) \rangle - \frac{1}{2(L - \mu)} \|\nabla h(y_k)\|^2 \\ &\quad + \left(1 - \frac{\mu\tau_z}{\tau_x}\right) \frac{\alpha}{2} \left( \|z_k - x^*\|^2 - \left(1 + \frac{\mu}{\alpha}\right)^2 \mathbb{E}_{i_k} [\|z_{k+1} - x^*\|^2] \right) \\ &\quad + \left( \frac{1}{2\alpha} - \frac{\mu\tau_z}{2\alpha\tau_x} \right) \mathbb{E}_{i_k} [\|\mathcal{H}_{y_k}^{\text{SVRG}}\|^2]. \end{aligned}$$

To bound the shifted moment, we apply the interpolation condition of  $h_{i_k}$ , i.e.,

$$\begin{aligned} \mathbb{E}_{i_k} [\|\mathcal{H}_{y_k}^{\text{SVRG}}\|^2] &= \mathbb{E}_{i_k} [\|\nabla h_{i_k}(y_k) - \nabla h_{i_k}(\tilde{x}_s)\|^2] + 2 \langle \nabla h(y_k), \nabla h(\tilde{x}_s) \rangle - \|\nabla h(\tilde{x}_s)\|^2 \\ &\leq 2(L - \mu)(h(\tilde{x}_s) - h(y_k) - \langle \nabla h(y_k), \tilde{x}_s - y_k \rangle) + 2 \langle \nabla h(y_k), \nabla h(\tilde{x}_s) \rangle \\ &\quad - \|\nabla h(\tilde{x}_s)\|^2. \end{aligned}$$

After re-arranging the terms, we obtain

$$\begin{aligned} h(y_k) &\leq \left(1 - \frac{\mu\tau_z}{\tau_x}\right) \frac{L - \mu}{\alpha} (h(\tilde{x}_s) - h(y_k)) \\ &\quad + \left[ \frac{1 - \tau_x}{\tau_x} - \left(1 - \frac{\mu\tau_z}{\tau_x}\right) \frac{L - \mu}{\alpha} \right] \langle \nabla h(y_k), \tilde{x}_s - y_k \rangle \\ &\quad + \left(1 - \frac{\mu\tau_z}{\tau_x}\right) \frac{\alpha}{2} \left( \|z_k - x^*\|^2 - \left(1 + \frac{\mu}{\alpha}\right)^2 \mathbb{E}_{i_k} [\|z_{k+1} - x^*\|^2] \right) \\ &\quad + \left( \frac{1}{\alpha} - \frac{\mu\tau_z}{\alpha\tau_x} - \frac{\tau_z}{\tau_x} \right) \langle \nabla h(y_k), \nabla h(\tilde{x}_s) \rangle - \frac{1}{2(L - \mu)} \|\nabla h(y_k)\|^2 \\ &\quad - \left( \frac{1}{2\alpha} - \frac{\mu\tau_z}{2\alpha\tau_x} \right) \|\nabla h(\tilde{x}_s)\|^2. \end{aligned}$$

To cancel  $\langle \nabla h(y_k), \tilde{x}_s - y_k \rangle$ , we choose  $\tau_z$  such that  $\frac{1 - \tau_x}{\tau_x} = \left(1 - \frac{\mu\tau_z}{\tau_x}\right) \frac{L - \mu}{\alpha}$ , which gives

$$\begin{aligned} h(y_k) &\leq (1 - \tau_x)h(\tilde{x}_s) + \frac{\alpha^2(1 - \tau_x)}{2(L - \mu)} \left( \|z_k - x^*\|^2 - \left(1 + \frac{\mu}{\alpha}\right)^2 \mathbb{E}_{i_k} [\|z_{k+1} - x^*\|^2] \right) \\ &\quad + \frac{\alpha + \mu - (\alpha + L)\tau_x}{(L - \mu)\mu} \langle \nabla h(y_k), \nabla h(\tilde{x}_s) \rangle - \frac{\tau_x}{2(L - \mu)} \|\nabla h(y_k)\|^2 \\ &\quad - \frac{1 - \tau_x}{2(L - \mu)} \|\nabla h(\tilde{x}_s)\|^2. \end{aligned} \tag{7}$$

In view of the Lyapunov function  $T_s \triangleq h(\tilde{x}_s) - c_1 \|\nabla h(\tilde{x}_s)\|^2 + \frac{\lambda}{2} \|z_0^s - x^*\|^2$ , there are two ways to deal with the inner product  $\langle \nabla h(y_k), \nabla h(\tilde{x}_s) \rangle$ :

**Case I** ( $c_1 = 0$ ): Choosing  $\tau_x$  such that  $\alpha + \mu - (\alpha + L)\tau_x = 0 \implies \tau_x = \frac{\alpha + \mu}{\alpha + L}$  and dropping the negative gradient norms in (7), we arrive at (9) with  $c_1 = 0$ .

**Case II** ( $c_1 \neq 0$ ): Denoting  $\gamma = \frac{|\alpha + \mu - (\alpha + L)\tau_x|}{(L - \mu)\mu}$  and using Young's inequality for  $\langle \nabla h(y_k), \nabla h(\tilde{x}_s) \rangle$  with parameter  $\beta > 0$ , we can bound (7) as

$$\begin{aligned} h(y_k) &\leq (1 - \tau_x)h(\tilde{x}_s) + \frac{\alpha^2(1 - \tau_x)}{2(L - \mu)} \left( \|z_k - x^*\|^2 - \left(1 + \frac{\mu}{\alpha}\right)^2 \mathbb{E}_{i_k} [\|z_{k+1} - x^*\|^2] \right) \\ &\quad + \left( \frac{\beta\gamma}{2} - \frac{\tau_x}{2(L - \mu)} \right) \|\nabla h(y_k)\|^2 - \left( \frac{1 - \tau_x}{2(L - \mu)} - \frac{\gamma}{2\beta} \right) \|\nabla h(\tilde{x}_s)\|^2. \end{aligned} \quad (8)$$

We require  $\gamma \neq 0$  and choose  $\beta > 0$  such that

$$\frac{\beta\gamma}{2} - \frac{\tau_x}{2(L - \mu)} = \frac{1}{1 - \tau_x} \left( \frac{1 - \tau_x}{2(L - \mu)} - \frac{\gamma}{2\beta} \right) = c_1 > 0.$$

It can be verified that this requirement and the existence of  $\beta$  are equivalent to the following constraints:

$$\begin{cases} \tau_x \neq \frac{\alpha + \mu}{\alpha + L}, \\ (1 + \tau_x)^2(1 - \tau_x) \geq 4 \left( \left( \frac{\alpha}{\mu} + 1 \right) - \left( \frac{\alpha}{\mu} + \kappa \right) \tau_x \right)^2. \end{cases}$$

Under these constraints, denoting  $\Delta = \frac{(1 + \tau_x)^2}{(L - \mu)^2} - \frac{4\gamma^2}{1 - \tau_x} \geq 0$ , we can choose  $\beta = \frac{1 + \tau_x}{2\gamma(L - \mu)} + \frac{\sqrt{\Delta}}{2\gamma}$ , which ensures  $c_1 \in ]0, \frac{1}{2(L - \mu)}[$ .

Let  $c_2 \triangleq \frac{\alpha^2(1 - \tau_x)}{L - \mu}$ . These two cases result in the same inequality:

$$\begin{aligned} h(y_k) - c_1 \|\nabla h(y_k)\|^2 &\leq (1 - \tau_x)(h(\tilde{x}_s) - c_1 \|\nabla h(\tilde{x}_s)\|^2) \\ &\quad + \frac{c_2}{2} \left( \|z_k - x^*\|^2 - \left(1 + \frac{\mu}{\alpha}\right)^2 \mathbb{E}_{i_k} [\|z_{k+1} - x^*\|^2] \right). \end{aligned} \quad (9)$$

Finally, summing the above inequality from  $k = 0, \dots, m - 1$  with weight  $\left(1 + \frac{\mu}{\alpha}\right)^{2k}$ , we conclude that

$$\begin{aligned} \mathbb{E}[h(\tilde{x}_{s+1}) - c_1 \|\nabla h(\tilde{x}_{s+1})\|^2] &= \sum_{k=0}^{m-1} \frac{1}{\bar{\omega}} \left(1 + \frac{\mu}{\alpha}\right)^{2k} \mathbb{E}[h(y_k^s) - c_1 \|\nabla h(y_k^s)\|^2] \\ &\leq (1 - \tau_x)(h(\tilde{x}_s) - c_1 \|\nabla h(\tilde{x}_s)\|^2) + \frac{c_2}{2\bar{\omega}} \left( \|z_0^s - x^*\|^2 - \left(1 + \frac{\mu}{\alpha}\right)^{2m} \mathbb{E}[\|z_m^s - x^*\|^2] \right). \end{aligned} \quad (10)$$

Imposing the constraint  $\left(1 + \frac{\mu}{\alpha}\right)^{2m} (1 - \tau_x) \leq 1$  completes the proof.

## C.2 Proof of Proposition 2.1

The choice

$$\begin{cases} \alpha = \sqrt{cm\mu L} - \mu, \\ \tau_x = \left(1 - \frac{1}{c\kappa}\right) \frac{\alpha + \mu}{\alpha + L} = \left(1 - \frac{1}{c\kappa}\right) \frac{\sqrt{cm\kappa}}{\sqrt{cm\kappa} + \kappa - 1}, \end{cases}$$

and the constraints

$$(1 + \tau_x)^2(1 - \tau_x) \geq 4 \left( \left( \frac{\alpha}{\mu} + 1 \right) - \left( \frac{\alpha}{\mu} + \kappa \right) \tau_x \right)^2, \quad (11)$$

$$\left(1 + \frac{\mu}{\alpha}\right)^{2m} (1 - \tau_x) \leq 1, \quad (12)$$

are put here for reference.

Note that for  $m \in (0, \frac{3}{4}\kappa]$ ,  $\tau_x = \frac{c\kappa-1}{c\kappa+\sqrt{\frac{c\kappa}{m}(\kappa-1)}}$  increases monotonically and  $\frac{1+\tau_x}{m}$  decreases monotonically as  $m$  increases. Thus, for the constraint (11), letting

$$\phi(m, \kappa) \triangleq \frac{(1+\tau_x)^2(1-\tau_x)}{\left(\left(\frac{\alpha}{\mu}+1\right)-\left(\frac{\alpha}{\mu}+\kappa\right)\tau_x\right)^2} = \frac{1+\tau_x}{m} (1-\tau_x^2) c\kappa,$$

we have  $\phi(m, \kappa)$  decreases monotonically as  $m$  increases.

When  $m = \frac{3}{4}\kappa$ ,  $\tau_x = \frac{c\kappa-1}{(c+\sqrt{\frac{4c}{3}})\kappa-\sqrt{\frac{4c}{3}}}$ . For  $\kappa \geq 1$ , if  $c + \sqrt{\frac{4c}{3}} - c\sqrt{\frac{4c}{3}} \leq 0 \Leftrightarrow c \geq \frac{(\sqrt{3}+\sqrt{19})^2}{16} \approx 2.319$ , we have  $\tau_x$  decreases monotonically as  $\kappa$  increases. In this case, letting  $\kappa \rightarrow \infty$ , we conclude that  $\tau_x > \frac{c}{c+\sqrt{\frac{4c}{3}}} > \frac{1}{3}$ , which implies that  $(1+\tau_x)^2(1-\tau_x)$  increases monotonically as  $\tau_x$  decreases. Thus,

$$\phi(m, \kappa) \geq \phi\left(\frac{3}{4}\kappa, \kappa\right) \geq \phi\left(\frac{3}{4}, 1\right) = \frac{4}{3} \left(1 + \frac{c-1}{c}\right) \left(1 - \left(\frac{c-1}{c}\right)^2\right) c.$$

To meet the constraint (11), we require  $c \geq 2 + \sqrt{3} \approx 3.74$ .

For constraint (12), defining

$$\psi(m, \kappa) \triangleq \left(\frac{\alpha+\mu}{\alpha}\right)^{2m} (1-\tau_x) = \left(1 + \frac{1}{\sqrt{cm\kappa}-1}\right)^{2m} \frac{\sqrt{cm\kappa} + c\kappa(\kappa-1)}{(\sqrt{cm\kappa}-1 + \kappa)c\kappa},$$

we have  $\frac{\partial\psi}{\partial m} =$

$$\begin{aligned} \left(1 + \frac{1}{\sqrt{cm\kappa}-1}\right)^{2m} \left[ \left(2 \ln \left(1 + \frac{1}{\sqrt{cm\kappa}-1}\right) - \frac{1}{\sqrt{cm\kappa}-1}\right) \frac{\sqrt{cm\kappa} + c\kappa(\kappa-1)}{(\sqrt{cm\kappa}-1 + \kappa)c\kappa} \right. \\ \left. - \frac{(\kappa-1)(c\kappa-1)}{2\sqrt{cm\kappa}(\sqrt{cm\kappa}-1 + \kappa)^2} \right]. \end{aligned}$$

Denote  $q = \sqrt{cm\kappa} - 1 > 0$ . The roots of  $\frac{\partial\psi}{\partial m}$  are identified by the following equation:

$$s(q) \triangleq 2 \ln \left(1 + \frac{1}{q}\right) - \frac{1}{q} - \frac{b_0}{(q+1)(q+\kappa)(q+b_1)} = 0,$$

where  $b_0 = \frac{c\kappa}{2}(\kappa-1)(c\kappa-1)$ ,  $b_1 = 1 + c\kappa(\kappa-1)$ . Taking derivative, we see that when  $q \rightarrow 0$ ,  $s'(q) \geq \frac{1}{q^2} - \frac{2}{q(1+q)} \rightarrow \infty$ . We can arrange the equation  $s'(q) = 0$  as finding the real roots of a polynomial. By Descartes' rule of signs, this equation has exactly one positive root (with  $c \geq 2 + \sqrt{3}$ , we have  $\kappa b_1 - 1 - b_0 \leq 0$  for any  $\kappa \geq 1$  and then there is exactly one sign change in the polynomial). Thus, as  $q$  increases,  $s(q)$  first increases monotonically to the unique root and then decreases monotonically.

To see that  $s(q)$  has exactly one root, let  $q \rightarrow 0$ ,  $s(q) \leq 2 \ln \left(1 + \frac{1}{q}\right) - \frac{1}{q} \rightarrow -\infty$ ; when  $q$  is large enough (e.g.,  $q > 2$  and  $(q+\kappa)(q+b_1) > 2b_0$ ),  $s(q) > 0$ ; let  $q \rightarrow \infty$ ,  $s(q) \rightarrow 0$ . These facts suggest that  $s(q)$  has a unique root. Thus, we conclude that, as  $m$  increases,  $\psi(m, \kappa)$  first decreases monotonically to the unique root and then increases monotonically, which means that for  $m \in [2, \frac{3}{4}\kappa]$ ,  $\psi(m, \kappa) \leq \max \{\psi(2, \kappa), \psi(\frac{3}{4}\kappa, \kappa)\}$ .

For  $\psi(2, \kappa)$ ,  $\psi'(2, \kappa) = \left(1 + \frac{1}{\sqrt{2c\kappa}-1}\right)^4 (\sqrt{2c\kappa} + \kappa - 1)^{-2} (\sqrt{2c\kappa} - 1)^{-1} \ell(\kappa)$ , where  $\ell(\kappa)$  is a polynomial:

$$\ell(\kappa) \triangleq (c-2)\kappa - \frac{5\sqrt{2c}}{2}\kappa^{\frac{1}{2}} + (c+1) - \left(\sqrt{\frac{c}{2}} + \frac{1}{\sqrt{2c}}\right)\kappa^{-\frac{1}{2}} - 3\kappa^{-1} + \frac{3}{\sqrt{2c}}\kappa^{-\frac{3}{2}}.$$

It can be verified that with  $c \geq 2 + \sqrt{3}$ , for any  $\kappa \geq \frac{8}{3}$ ,  $\ell'(\kappa) > 0$ , which suggests that  $\psi(2, \kappa) \leq \max \{\psi(2, \frac{8}{3}), \psi(2, \infty)\} \leq 1$  (with  $c \geq 2 + \sqrt{3}$ ,  $\psi(2, \frac{8}{3}) \leq 0.953$  and  $\psi(2, \infty) = 1$ ).

For  $\psi(\frac{3}{4}\kappa, \kappa)$ ,  $\psi'(\frac{3}{4}\kappa, \kappa) = \left(1 + \frac{2}{\sqrt{3c\kappa}-2}\right)^{\frac{3}{2}\kappa} \left(\left(c + \sqrt{\frac{4c}{3}}\right)\kappa - \sqrt{\frac{4c}{3}}\right)^{-1} \omega_1(\kappa)$ , where

$$\omega_1(\kappa) \triangleq \left(\ln\left(1 + \frac{2}{\sqrt{3c\kappa}-2}\right) - \frac{2}{\sqrt{3c\kappa}-2}\right) \left(\sqrt{3c\kappa} - \sqrt{3c} + \frac{3}{2}\right) + \frac{\sqrt{\frac{4c}{3}}c - c - \sqrt{\frac{4c}{3}}}{\left(c + \sqrt{\frac{4c}{3}}\right)\kappa - \sqrt{\frac{4c}{3}}}.$$

Let  $p = \sqrt{3c\kappa} - 2 > 0$ , the roots of  $\omega_1(\kappa)$  are determined by the equation

$$\omega_2(p) \triangleq \ln\left(1 + \frac{2}{p}\right) - \frac{2}{p} + \frac{\frac{3}{2+\sqrt{3c}}\left(\sqrt{\frac{4c}{3}}c - c - \sqrt{\frac{4c}{3}}\right)}{\left(p + \frac{4}{2+\sqrt{3c}}\right)\left(p + \frac{7}{2} - \sqrt{3c}\right)} = 0.$$

To ensure that  $\omega_2(p)$  increases monotonically as  $p$  increases, it suffices to set  $c \leq 3.817$  (which ensures that  $\omega_2'(p) > 0$ ). Thus, for any  $p > 0$ ,  $\omega_2(p) \leq \lim_{p \rightarrow \infty} \omega_2(p) = 0 \Rightarrow$  for any  $\kappa \geq 1$ ,  $\omega_1(\kappa) \leq 0$ . Finally, we conclude that with  $3.817 \geq c \geq 2 + \sqrt{3}$ ,  $\psi(\frac{3}{4}\kappa, \kappa) \leq \psi(2, \frac{8}{3}) \leq 0.953$ , which completes the proof.

### C.3 Proof of Proposition 2.2

The choice  $\begin{cases} \alpha = \frac{3L}{2} - \mu, \\ \tau_x = \left(1 - \frac{1}{6m}\right) \frac{\alpha + \mu}{\alpha + L} = \left(1 - \frac{1}{6m}\right) \frac{3\kappa}{5\kappa - 2}, \end{cases}$  is put here for reference.

We examine the constraint  $(1 + \tau_x)^2(1 - \tau_x) \geq 4 \left(\left(\frac{\alpha}{\mu} + 1\right) - \left(\frac{\alpha}{\mu} + \kappa\right)\tau_x\right)^2$ . Let

$$\phi(m, \kappa) \triangleq \frac{(1 + \tau_x)^2(1 - \tau_x)}{4 \left(\left(\frac{\alpha}{\mu} + 1\right) - \left(\frac{\alpha}{\mu} + \kappa\right)\tau_x\right)^2} = \frac{(1 + \tau_x)^2(1 - \tau_x)4m^2}{\kappa^2}.$$

For  $m \geq \frac{3}{4}\kappa$ , we have  $\tau_x$  and  $(1 - \tau_x)m$  increases monotonically as  $m$  increases. Thus,  $\phi(m, \kappa)$  increases as  $m$  increases  $\Rightarrow \phi(m, \kappa) \geq \phi(\frac{3}{4}\kappa, \kappa)$ .

$\phi(\frac{3}{4}\kappa, \kappa) = \frac{9}{4}(1 + \tau_x)^2(1 - \tau_x)$  and  $\tau_x = \frac{9\kappa-2}{15\kappa-6}$  in this case. Note that for  $\kappa \geq 1$ ,  $\tau_x$  decreases as  $\kappa$  increases and let  $\kappa \rightarrow \infty$ , we conclude that  $\tau_x > \frac{3}{5} > \frac{1}{3} \Rightarrow (1 + \tau_x)^2(1 - \tau_x)$  increases as  $\tau_x$  decreases. Thus,  $\phi(\frac{3}{4}\kappa, \kappa) \geq \phi(\frac{3}{4}, 1) > 1$ , the constraint is satisfied.

Using this choice, we can write the per-epoch contraction (10) in Theorem 2 as

$$\begin{aligned} & \mathbb{E}[h(\tilde{x}_{s+1}) - c_1 \|\nabla h(\tilde{x}_{s+1})\|^2] + \frac{\alpha^2(1 - \tau_x)}{2\tilde{\omega}(L - \mu)} \left(1 + \frac{\mu}{\alpha}\right)^{2m} \mathbb{E}[\|z_0^{s+1} - x^*\|^2] \\ & \leq (1 - \tau_x)(h(\tilde{x}_s) - c_1 \|\nabla h(\tilde{x}_s)\|^2) + \frac{\alpha^2(1 - \tau_x)}{2\tilde{\omega}(L - \mu)} \|z_0^s - x^*\|^2. \end{aligned}$$

Note that for  $\frac{m}{\kappa} > \frac{3}{4}$ ,  $\tau_x > \frac{1}{2}$  and by Bernoulli's inequality,  $\left(1 + \frac{\mu}{\alpha}\right)^{2m} \geq 1 + \frac{2m\mu}{\alpha} = 1 + \frac{4m}{3\kappa-2} > 2$ . Let  $\lambda = \frac{2\alpha^2(1-\tau_x)}{\tilde{\omega}(L-\mu)}$ . The above contraction becomes

$$\begin{aligned} & \mathbb{E}[h(\tilde{x}_{s+1}) - c_1 \|\nabla h(\tilde{x}_{s+1})\|^2] + \frac{\lambda}{2} \mathbb{E}[\|z_0^{s+1} - x^*\|^2] \\ & \leq \frac{1}{2} \cdot \left(h(\tilde{x}_s) - c_1 \|\nabla h(\tilde{x}_s)\|^2 + \frac{\lambda}{2} \|z_0^s - x^*\|^2\right). \end{aligned}$$

Telescoping this inequality from  $S - 1$  to 0, we obtain  $T_S \leq \frac{1}{2^S} T_0$ , and since  $m = 2n$ , these imply an  $O(n \log \frac{1}{\epsilon})$  iteration complexity.

---

**Algorithm 4** SAGA Boosted by Shifting objective (BS-SAGA)

---

**Input:** Parameters  $\alpha > 0, \tau_x \in ]0, 1[$  and initial guess  $x_0 \in \mathbb{R}^d$ , iteration number  $K$ .

**Initialize:**  $z_0 = x_0, \tau_z = \frac{\tau_x}{\mu} - \frac{\alpha(1-\tau_x)}{\mu(L-\mu)}$ , a point table  $\phi^0 \in \mathbb{R}^{d \times n}$  with  $\forall i \in [n], \phi_i^0 = x_0$ , running averages for the point table and its gradients.

1: **for**  $k = 0, \dots, K - 1$  **do**

2:   Sample  $i_k$  uniformly in  $[n]$ , set  $\phi_{i_k}^{k+1} = \tau_x z_k + (1 - \tau_x) \phi_{i_k}^k + \tau_z (\mu(\bar{\phi}^k - z_k) - \frac{1}{n} \sum_{i=1}^n \nabla f_i(\phi_i^k))$  and keep other entries unchanged (i.e., for  $i \neq i_k, \phi_i^{k+1} = \phi_i^k$ ).

3:    $z_{k+1} = \arg \min_x \left\{ \langle \mathcal{G}_{\phi_{i_k}^{k+1}}^{\text{SAGA}}, x \rangle + (\alpha/2) \|x - z_k\|^2 + (\mu/2) \|x - \phi_{i_k}^{k+1}\|^2 \right\}$ .

4:   Update the running averages according to the change in  $\phi^{k+1}$ .

5: **end for**

**Output:**  $z_K$ .

---

#### C.4 BS-SAGA

To make the notations specific, we define

$$\begin{aligned} \mathcal{H}_{x_k}^{\text{SAGA}} &\triangleq \nabla h_{i_k}(x_k) - \nabla h_{i_k}(\phi_{i_k}^k) + \frac{1}{n} \sum_{i=1}^n \nabla h_i(\phi_i^k) \\ \Rightarrow \mathcal{G}_{x_k}^{\text{SAGA}} &\triangleq \nabla f_{i_k}(x_k) - \nabla f_{i_k}(\phi_{i_k}^k) + \frac{1}{n} \sum_{i=1}^n \nabla f_i(\phi_i^k) - \mu(\bar{\phi}^k - \phi_{i_k}^k), \end{aligned}$$

where  $\phi^k \in \mathbb{R}^{d \times n}$  is a point table that stores  $n$  previously chosen random anchor points and  $\bar{\phi}^k \triangleq \frac{1}{n} \sum_{i=1}^n \phi_i^k$  denotes the average of point table.

The Lyapunov function (with  $c_1 \in \left[0, \frac{1}{2(L-\mu)}\right], \lambda > 0$ ) is put here for reference:

$$T_k = \frac{1}{n} \sum_{i=1}^n h_i(\phi_i^k) - c_1 \left\| \frac{1}{n} \sum_{i=1}^n \nabla h_i(\phi_i^k) \right\|^2 + \frac{\lambda}{2} \|z_k - x^*\|^2. \quad (13)$$

We present the SAGA variant in Algorithm 4. In the following theorem, we only consider a simple case with  $c_1 = 0$  in  $T_k$ . It is possible to analyze BS-SAGA with  $c_1 \neq 0$  as is the case for BS-SVRG (the analysis in Appendix C.1). However, it leads to highly complicated parameter constraints. We provide a simple parameter choice similar to the one in Proposition 2.3.

**Theorem C.1.** *In Algorithm 4, if we choose  $\alpha, \tau_x$  as*

$$\begin{cases} \alpha \text{ is solved from the equation } \left(1 + \frac{\mu}{\alpha}\right)^2 \left(1 - \frac{\alpha+\mu}{(\alpha+L)n}\right) = 1, \\ \tau_x = \frac{\alpha+\mu}{\alpha+L}, \end{cases} \quad (14)$$

*the following per-iteration contraction holds for the Lyapunov function defined at (13) (with  $c_1 = 0$ ).*

$$\text{With } \lambda = \frac{(1 - \tau_x)(\alpha + \mu)^2}{(L - \mu)n}, \quad \mathbb{E}_{i_k}[T_{k+1}] \leq \left(1 + \frac{\mu}{\alpha}\right)^{-2} T_k, \text{ for } k \geq 0.$$

Regrading the rate, from (14), we can figure out that  $\alpha$  is the unique positive root of the cubic equation:

$$\left(\frac{\alpha}{\mu}\right)^3 - (2n - 3) \left(\frac{\alpha}{\mu}\right)^2 - (2n\kappa + n - 3) \left(\frac{\alpha}{\mu}\right) - (n\kappa - 1) = 0.$$

Using a similar argument as in Theorem 3, we can show that  $\frac{\alpha}{\mu} = O(n + \sqrt{n\kappa})$ , and thus conclude an  $O((n + \sqrt{n\kappa}) \log \frac{1}{\epsilon})$  expected complexity for BS-SAGA. Interestingly, this rate is always slightly slower than that of BS-Point-SAGA.



### C.4.1 Proof of Theorem C.1

To simplify the notations in this proof, we let  $\Phi^k \triangleq \frac{1}{n} \sum_{i=1}^n h_i(\phi_i^k)$  and  $\nabla \Phi^k \triangleq \frac{1}{n} \sum_{i=1}^n \nabla h_i(\phi_i^k)$ .

Using the trick in Lemma 3 (with  $f = h_{i_k}$ ) for  $\phi_{i_k}^{k+1}$ , strengthening the convexity with the interpolation condition and taking the expectation, we obtain

$$\begin{aligned} \mathbb{E}_{i_k} [h_{i_k}(\phi_{i_k}^{k+1})] &\leq \frac{1-\tau_x}{\tau_x} \mathbb{E}_{i_k} [\langle \nabla h_{i_k}(\phi_{i_k}^{k+1}), \phi_{i_k}^k - \phi_{i_k}^{k+1} \rangle] + \mathbb{E}_{i_k} [\langle \nabla h_{i_k}(\phi_{i_k}^{k+1}), z_k - x^* \rangle] \\ &\quad + \frac{\tau_z}{\tau_x} \mathbb{E}_{i_k} \left[ \left\langle \nabla h_{i_k}(\phi_{i_k}^{k+1}), \mu(\bar{\phi}^k - z_k) - \frac{1}{n} \sum_{i=1}^n \nabla f_i(\phi_i^k) \right\rangle \right] \\ &\quad - \frac{1}{2(L-\mu)} \mathbb{E}_{i_k} [\|\nabla h_{i_k}(\phi_{i_k}^{k+1})\|^2]. \end{aligned}$$

Note that by the definition of  $h_i$ ,  $\mu(\bar{\phi}^k - z_k) - \frac{1}{n} \sum_{i=1}^n \nabla f_i(\phi_i^k) = \mu(x^* - z_k) - \nabla \Phi^k$ , and thus

$$\begin{aligned} \mathbb{E}_{i_k} [h_{i_k}(\phi_{i_k}^{k+1})] &\leq \frac{1-\tau_x}{\tau_x} \mathbb{E}_{i_k} [\langle \nabla h_{i_k}(\phi_{i_k}^{k+1}), \phi_{i_k}^k - \phi_{i_k}^{k+1} \rangle] - \frac{\tau_z}{\tau_x} \mathbb{E}_{i_k} [\langle \nabla h_{i_k}(\phi_{i_k}^{k+1}), \nabla \Phi^k \rangle] \\ &\quad + \left(1 - \frac{\mu\tau_z}{\tau_x}\right) \mathbb{E}_{i_k} [\langle \nabla h_{i_k}(\phi_{i_k}^{k+1}), z_k - x^* \rangle] \\ &\quad - \frac{1}{2(L-\mu)} \|\mathbb{E}_{i_k} [\nabla h_{i_k}(\phi_{i_k}^{k+1})]\|^2, \end{aligned} \tag{15}$$

which also uses Jensen's inequality, i.e.,  $\mathbb{E}_{i_k} [\|\nabla h_{i_k}(\phi_{i_k}^{k+1})\|^2] \geq \|\mathbb{E}_{i_k} [\nabla h_{i_k}(\phi_{i_k}^{k+1})]\|^2$ .

Using Lemma 1 with  $\mathcal{H}_y = \mathcal{H}_{\phi_{i_k}^{k+1}}^{\text{SAGA}}$ ,  $\mathcal{G}_y = \mathcal{G}_{\phi_{i_k}^{k+1}}^{\text{SAGA}}$ ,  $z^+ = z_{k+1}$  and taking the expectation, we obtain

$$\begin{aligned} \mathbb{E}_{i_k} [\langle \nabla h_{i_k}(\phi_{i_k}^{k+1}), z_k - x^* \rangle] &= \frac{\alpha}{2} \left( \|z_k - x^*\|^2 - \left(1 + \frac{\mu}{\alpha}\right)^2 \mathbb{E}_{i_k} [\|z_{k+1} - x^*\|^2] \right) \\ &\quad + \frac{1}{2\alpha} \mathbb{E}_{i_k} \left[ \left\| \mathcal{H}_{\phi_{i_k}^{k+1}}^{\text{SAGA}} \right\|^2 \right]. \end{aligned} \tag{16}$$

Using the interpolation condition of  $h_{i_k}$  to bound the stochastic moment,

$$\begin{aligned} \mathbb{E}_{i_k} \left[ \left\| \mathcal{H}_{\phi_{i_k}^{k+1}}^{\text{SAGA}} \right\|^2 \right] &= \mathbb{E}_{i_k} [\|\nabla h_{i_k}(\phi_{i_k}^{k+1}) - \nabla h_{i_k}(\phi_{i_k}^k)\|^2] + 2\mathbb{E}_{i_k} [\langle \nabla h_{i_k}(\phi_{i_k}^{k+1}), \nabla \Phi^k \rangle] \\ &\quad - \|\nabla \Phi^k\|^2 \\ &\leq 2(L-\mu) (\Phi^k - \mathbb{E}_{i_k} [h_{i_k}(\phi_{i_k}^{k+1})] - \mathbb{E}_{i_k} [\langle \nabla h_{i_k}(\phi_{i_k}^{k+1}), \phi_{i_k}^k - \phi_{i_k}^{k+1} \rangle]) \\ &\quad + 2\mathbb{E}_{i_k} [\langle \nabla h_{i_k}(\phi_{i_k}^{k+1}), \nabla \Phi^k \rangle] - \|\nabla \Phi^k\|^2. \end{aligned} \tag{17}$$

Based on the updating rules of  $\phi^{k+1}$ , the following relations hold

$$\mathbb{E}_{i_k} [\Phi^{k+1}] = \frac{1}{n} \mathbb{E}_{i_k} [h_{i_k}(\phi_{i_k}^{k+1})] + \frac{n-1}{n} \Phi^k, \tag{18}$$

$$\mathbb{E}_{i_k} [\nabla \Phi^{k+1}] = \frac{1}{n} \mathbb{E}_{i_k} [\nabla h_{i_k}(\phi_{i_k}^{k+1})] + \frac{n-1}{n} \nabla \Phi^k, \tag{19}$$

where (19) implies that

$$\begin{aligned} \|\mathbb{E}_{i_k} [\nabla h_{i_k}(\phi_{i_k}^{k+1})]\|^2 &= n^2 \|\mathbb{E}_{i_k} [\nabla \Phi^{k+1}]\|^2 - 2(n^2 - n) \langle \mathbb{E}_{i_k} [\nabla \Phi^{k+1}], \nabla \Phi^k \rangle \\ &\quad + (n-1)^2 \|\nabla \Phi^k\|^2, \end{aligned} \tag{20}$$

$$\mathbb{E}_{i_k} [\langle \nabla h_{i_k}(\phi_{i_k}^{k+1}), \nabla \Phi^k \rangle] = n \langle \mathbb{E}_{i_k} [\nabla \Phi^{k+1}], \nabla \Phi^k \rangle - (n-1) \|\nabla \Phi^k\|^2. \tag{21}$$

Then, expanding (15) using (16), (17), (20) and (21), we obtain

$$\begin{aligned}
\frac{1}{n} \mathbb{E}_{i_k} [h_{i_k}(\phi_{i_k}^{k+1})] &\leq \left[ \frac{1-\tau_x}{\tau_x n} - \left(1 - \frac{\mu\tau_z}{\tau_x}\right) \frac{L-\mu}{\alpha n} \right] \mathbb{E}_{i_k} [\langle \nabla h_{i_k}(\phi_{i_k}^{k+1}), \phi_{i_k}^k - \phi_{i_k}^{k+1} \rangle] \\
&\quad + \left(1 - \frac{\mu\tau_z}{\tau_x}\right) \frac{L-\mu}{\alpha n} \left( \Phi^k - \mathbb{E}_{i_k} [h_{i_k}(\phi_{i_k}^{k+1})] \right) \\
&\quad + \left(1 - \frac{\mu\tau_z}{\tau_x}\right) \frac{\alpha}{2n} \left( \|z_k - x^*\|^2 - \left(1 + \frac{\mu}{\alpha}\right)^2 \mathbb{E}_{i_k} [\|z_{k+1} - x^*\|^2] \right) \\
&\quad + \left[ \frac{1}{\alpha} - \frac{\mu\tau_z}{\alpha\tau_x} - \frac{\tau_z}{\tau_x} + \frac{n-1}{L-\mu} \right] \langle \mathbb{E}_{i_k} [\nabla \Phi^{k+1}], \nabla \Phi^k \rangle \\
&\quad - \left[ \frac{(n-1)^2}{2(L-\mu)n} + \left(1 - \frac{\mu\tau_z}{\tau_x}\right) \frac{1}{2\alpha n} + \left( \frac{1}{\alpha} - \frac{\mu\tau_z}{\alpha\tau_x} - \frac{\tau_z}{\tau_x} \right) \frac{n-1}{n} \right] \|\nabla \Phi^k\|^2 \\
&\quad - \frac{n}{2(L-\mu)} \|\mathbb{E}_{i_k} [\nabla \Phi^{k+1}]\|^2.
\end{aligned}$$

Choosing  $\tau_z$  such that  $\frac{1-\tau_x}{\tau_x} = \left(1 - \frac{\mu\tau_z}{\tau_x}\right) \frac{L-\mu}{\alpha}$ , multiplying both sides by  $\tau_x$  and using (18), we can simplify the above inequality as

$$\begin{aligned}
\mathbb{E}_{i_k} [\Phi^{k+1}] &\leq \left(1 - \frac{\tau_x}{n}\right) \Phi^k + \frac{\alpha^2(1-\tau_x)}{2(L-\mu)n} \left( \|z_k - x^*\|^2 - \left(1 + \frac{\mu}{\alpha}\right)^2 \mathbb{E}_{i_k} [\|z_{k+1} - x^*\|^2] \right) \\
&\quad + \frac{\alpha + \mu - \tau_x(\alpha + L + \mu - \mu n)}{(L-\mu)\mu} \langle \mathbb{E}_{i_k} [\nabla \Phi^{k+1}], \nabla \Phi^k \rangle \\
&\quad - \frac{(n-2)\tau_x + \frac{1}{n} + \left(\frac{\alpha}{\mu} + 1 - \left(\frac{\alpha}{\mu} + \kappa\right)\tau_x\right) \left(2 - \frac{2}{n}\right)}{2(L-\mu)} \|\nabla \Phi^k\|^2 \\
&\quad - \frac{n\tau_x}{2(L-\mu)} \|\mathbb{E}_{i_k} [\nabla \Phi^{k+1}]\|^2.
\end{aligned}$$

Fixing  $\tau_x = \frac{\alpha+\mu}{\alpha+L}$ , we obtain

$$\begin{aligned}
\mathbb{E}_{i_k} [\Phi^{k+1}] &\leq \left(1 - \frac{\tau_x}{n}\right) \Phi^k + \frac{\alpha^2(1-\tau_x)}{2(L-\mu)n} \left( \|z_k - x^*\|^2 - \left(1 + \frac{\mu}{\alpha}\right)^2 \mathbb{E}_{i_k} [\|z_{k+1} - x^*\|^2] \right) \\
&\quad + \frac{(n-1)\tau_x}{L-\mu} \langle \mathbb{E}_{i_k} [\nabla \Phi^{k+1}], \nabla \Phi^k \rangle - \frac{n\tau_x}{2(L-\mu)} \|\mathbb{E}_{i_k} [\nabla \Phi^{k+1}]\|^2 \\
&\quad - \frac{(n-2)\tau_x + \frac{1}{n}}{2(L-\mu)} \|\nabla \Phi^k\|^2.
\end{aligned}$$

Using Young's inequality with  $\beta > 0$ ,

$$\begin{aligned}
\mathbb{E}_{i_k} [\Phi^{k+1}] &\leq \left(1 - \frac{\tau_x}{n}\right) \Phi^k + \frac{\alpha^2(1-\tau_x)}{2(L-\mu)n} \left( \|z_k - x^*\|^2 - \left(1 + \frac{\mu}{\alpha}\right)^2 \mathbb{E}_{i_k} [\|z_{k+1} - x^*\|^2] \right) \\
&\quad + \frac{\beta(n-1)\tau_x - n\tau_x}{2(L-\mu)} \|\mathbb{E}_{i_k} [\nabla \Phi^{k+1}]\|^2 + \frac{\frac{(n-1)\tau_x}{\beta} - (n-2)\tau_x - \frac{1}{n}}{2(L-\mu)} \|\nabla \Phi^k\|^2.
\end{aligned}$$

Let  $\beta \in \left[ \frac{n-1}{n-2+\frac{1}{n\tau_x}}, \frac{n}{n-1} \right]$ . The last two terms become non-positive, and thus we have

$$\mathbb{E}_{i_k} [\Phi^{k+1}] \leq \left(1 - \frac{\tau_x}{n}\right) \cdot \Phi^k + \frac{\alpha^2(1-\tau_x)}{2(L-\mu)n} \left( \|z_k - x^*\|^2 - \left(1 + \frac{\mu}{\alpha}\right)^2 \mathbb{E}_{i_k} [\|z_{k+1} - x^*\|^2] \right).$$

Letting  $\left(1 - \frac{\tau_x}{n}\right) \left(1 + \frac{\mu}{\alpha}\right)^2 = 1$  completes the proof.

## D Proof for Section 5 (Theorem 3)

Using Lemma 2 with the relations

$$x_{k+1} = \text{prox}_{i_k}^\alpha \left( x_k + \frac{1}{\alpha} \left( \nabla f_{i_k}(\phi_{i_k}^k) - \frac{1}{n} \sum_{i=1}^n \nabla f_i(\phi_i^k) + \mu \left( \frac{1}{n} \sum_{i=1}^n \phi_i^k - \phi_{i_k}^k \right) \right) \right),$$

$$x^* = \text{prox}_{i_k}^\alpha \left( x^* + \frac{1}{\alpha} \nabla f_{i_k}(x^*) \right) \text{ and } \phi_{i_k}^{k+1} = x_{k+1},$$

and based on that  $\nabla h_i(x) = \nabla f_i(x) - \nabla f_i(x^*) - \mu(x - x^*)$ , we have

$$\left( 1 + \frac{2(\alpha + \mu)}{L - \mu} \right) \|\nabla h_{i_k}(\phi_{i_k}^{k+1})\|^2 + (\alpha + \mu)^2 \|x_{k+1} - x^*\|^2$$

$$\leq \alpha^2 \left\| x_k - x^* + \frac{1}{\alpha} \left( \nabla h_{i_k}(\phi_{i_k}^k) - \frac{1}{n} \sum_{i=1}^n \nabla h_i(\phi_i^k) \right) \right\|^2.$$

Expanding the right side, taking the expectation and using  $\mathbb{E}[\|X - \mathbb{E}X\|^2] \leq \mathbb{E}[\|X\|^2]$ , we obtain

$$\left( 1 + \frac{2(\alpha + \mu)}{L - \mu} \right) \mathbb{E}_{i_k} [\|\nabla h_{i_k}(\phi_{i_k}^{k+1})\|^2] + (\alpha + \mu)^2 \mathbb{E}_{i_k} [\|x_{k+1} - x^*\|^2]$$

$$\leq \alpha^2 \|x_k - x^*\|^2 + \frac{1}{n} \sum_{i=1}^n \|\nabla h_i(\phi_i^k)\|^2.$$

Note that by construction,

$$\mathbb{E}_{i_k} \left[ \sum_{i=1}^n \|\nabla h_i(\phi_i^{k+1})\|^2 \right] = \frac{n-1}{n} \sum_{i=1}^n \|\nabla h_i(\phi_i^k)\|^2 + \mathbb{E}_{i_k} [\|\nabla h_{i_k}(\phi_{i_k}^{k+1})\|^2].$$

We can thus arrange the terms as

$$\left( \frac{n}{\alpha^2} + \frac{2(\alpha + \mu)n}{\alpha^2(L - \mu)} \right) \mathbb{E}_{i_k} \left[ \frac{1}{n} \sum_{i=1}^n \|\nabla h_i(\phi_i^{k+1})\|^2 \right] + \left( 1 + \frac{\mu}{\alpha} \right)^2 \mathbb{E}_{i_k} [\|x_{k+1} - x^*\|^2]$$

$$\leq \left( \frac{n}{\alpha^2} + \frac{2(\alpha + \mu)(n-1)}{\alpha^2(L - \mu)} \right) \cdot \frac{1}{n} \sum_{i=1}^n \|\nabla h_i(\phi_i^k)\|^2 + \|x_k - x^*\|^2.$$

In view of the Lyapunov function, we choose  $\alpha$  to be the positive root of the following equation:

$$\left( 1 + \frac{\mu}{\alpha} \right)^2 \left( 1 - \frac{2(\alpha + \mu)}{n(L - \mu) + 2n(\alpha + \mu)} \right) = 1.$$

Let  $q = \frac{\alpha}{\mu} > 0$ , the above is a cubic equation:

$$s(q) \triangleq 2q^3 - (4n - 6)q^2 - (2n\kappa + 4n - 6)q - (n\kappa + n - 2) = 0,$$

which has a unique positive root (denoted as  $q^*$ ).

Note that  $s(-\infty) < 0$ ,  $s(-\frac{1}{2}) = \frac{1}{4}$  and  $s(0) \leq 0$ . These facts suggest that if for some  $u > 0$ ,  $s(u) > 0$ , we have  $q^* < u$ . It can be verified that  $s(2n + \sqrt{n\kappa}) > 0$ , and thus  $q^* = O(n + \sqrt{n\kappa})$ .

## E Experimental setup

We ran experiments on an HP Z440 machine with a single Intel Xeon E5-1630v4 with 3.70GHz cores, 16GB RAM, Ubuntu 18.04 LTS with GCC 4.8.0, MATLAB R2017b. We were optimizing the

following binary problems with  $a_i \in \mathbb{R}^d$ ,  $b_i \in \{-1, +1\}$ ,  $i \in [n]$ :

$$\ell_2\text{-Logistic Regression: } \frac{1}{n} \sum_{i=1}^n \log(1 + \exp(-b_i \langle a_i, x \rangle)) + \frac{\mu}{2} \|x\|^2,$$

$$\text{Ridge Regression: } \frac{1}{2n} \sum_{i=1}^n (\langle a_i, x \rangle - b_i)^2 + \frac{\mu}{2} \|x\|^2.$$

We used datasets from the LIBSVM website [9], including **a9a** (32,561 samples, 123 features), **covtype.binary** (581,012 samples, 54 features), **w8a** (49,749 samples, 300 features), **ijcnn1** (49,990 samples, 22 features). We added one dimension as bias to all the datasets.

We choose SAGA and Katyusha as the baselines in the finite-sum experiments due to the following reasons: SAGA has low iteration cost and good empirical performance with support for non-smooth regularizers, and is thus implemented in machine learning libraries such as scikit-learn [39]; Katyusha achieves the state-of-the-art performance for ill-conditioned problems<sup>11</sup>.

## F Analyzing NAG using Lyapunov function

---

### Algorithm 5 Nesterov's Accelerated Gradient (NAG)

---

**Input:** Parameters  $\alpha > 0$ ,  $\tau_y, \tau_x \in ]0, 1[$  and initial guesses  $x_0, z_0 \in \mathbb{R}^d$ , iteration number  $K$ .

1: **for**  $k = 0, \dots, K - 1$  **do**

2:  $y_k = \tau_y z_k + (1 - \tau_y) x_k$ .

3:  $z_{k+1} = \arg \min_x \left\{ \langle \nabla f(y_k), x \rangle + (\alpha/2) \|x - z_k\|^2 + (\mu/2) \|x - y_k\|^2 \right\}$ .

4:  $x_{k+1} = \tau_x z_{k+1} + (1 - \tau_x) x_k$ .

5: **end for**

**Output:**  $x_K$ .

---

In this section, we review the convergence of NAG in the strongly convex setting for a better comparison with the convergence guarantee and proof of G-TM. This Lyapunov analysis has been similarly presented in many existing works, e.g., [54, 18, 5, 38]. We adopt a simplified version of NAG in Algorithm 5 (1-memory accelerated methods, [52]) and only consider constant parameter choices. It is known that NAG can be analyzed based on the following Lyapunov function ( $\lambda > 0$ ):

$$T_k = f(x_k) - f(x^*) + \frac{\lambda}{2} \|z_k - x^*\|^2, \quad (22)$$

which is somehow suggested in the construction of the *estimate sequence* in [35]. This choice requires neither  $f(x_k) - f(x^*)$  nor  $\|z_k - x^*\|^2$  to be monotone decreasing over iterations, which is called the non-relaxational property in [32]. By re-organizing the proof in [35] under the notion of Lyapunov function, we obtain the per-iteration contraction of NAG in Theorem F.1.

**Theorem F.1.** *In Algorithm 5, suppose we choose  $\alpha, \tau_x, \tau_y$  under the constraints (23), the iterations satisfy the contraction (24) for the Lyapunov function (22).*

$$\begin{cases} \alpha \geq \frac{L(1-\tau_x)\tau_y}{1-\tau_y}, \tau_x \geq \tau_y, \\ \mu \geq \frac{L(\tau_x-\tau_y)}{1-\tau_y}, \\ (1 + \frac{\mu}{\alpha})(1 - \tau_x) \leq 1. \end{cases} \quad (23) \quad \begin{cases} \text{With } \lambda = (\alpha + \mu)\tau_x, \\ T_{k+1} \leq \left(1 + \frac{\mu}{\alpha}\right)^{-1} T_k, \text{ for } k \geq 0. \end{cases} \quad (24)$$

When the inequalities in constraints (23) (except  $\tau_x \geq \tau_y$ ) hold as equality, we derive the standard choice of NAG:  $\alpha = \sqrt{L\mu} - \mu$ ,  $\tau_y = (\sqrt{\kappa} + 1)^{-1}$ ,  $\tau_x = (\sqrt{\kappa})^{-1}$ . By substituting this choice and

---

<sup>11</sup>Zhou et al. [58] shows that SSNM can be faster than Katyusha in some cases. In theory, SSNM and Katyusha achieve the same rate if we set  $m = n$  for Katyusha (both require 2 oracle calls per-iteration). In practice, if  $m = n$ , they have similar performance (SSNM is often faster). Considering the stability and memory requirement, Katyusha still achieves the state-of-the-art performance both theoretically and empirically.

eliminating sequence  $\{z_k\}$ , we recover the widely-used scheme (Constant Step scheme III in [35]):

$$\begin{aligned} x_{k+1} &= y_k - \frac{1}{L} \nabla f(y_k), \\ y_{k+1} &= x_{k+1} + \frac{\sqrt{\kappa} - 1}{\sqrt{\kappa} + 1} (x_{k+1} - x_k). \end{aligned}$$

Telescoping (24), we obtain the original guarantee of NAG (cf. Theorem 2.2.3 in [35]),

$$f(x_K) - f(x^*) + \frac{\mu}{2} \|z_K - x^*\|^2 \leq \left(1 - \frac{1}{\sqrt{\kappa}}\right)^K \left(f(x_0) - f(x^*) + \frac{\mu}{2} \|z_0 - x^*\|^2\right).$$

If we regard the constraints (23) as an optimization problem with a target of minimizing the rate factor  $(1 + \frac{\mu}{\alpha})^{-1}$ , the rate factor  $1 - 1/\sqrt{\kappa}$  is optimal. Combining  $\alpha \geq \frac{L(1-\tau_x)\tau_y}{1-\tau_y}$  and  $\mu \geq \frac{L(\tau_x-\tau_y)}{1-\tau_y}$ , we have  $\alpha \geq L\tau_x - \mu$ . To minimize  $\alpha$ , we fix  $\alpha = L\tau_x - \mu$ , and it can be easily verified that in this case, the smallest rate factor is achieved when  $(1 + \frac{\mu}{\alpha})(1 - \tau_x) = 1$ . Note that these arguments do not consider variable-parameter choices and are limited to the current analysis framework only.

Denote the initial constant as  $C_0^{\text{NAG}} \triangleq f(x_0) - f(x^*) + \frac{\mu}{2} \|z_0 - x^*\|^2$ . This guarantee shows that in terms of reducing  $\|x - x^*\|^2$  to  $\epsilon$ , sequences  $\{x_k\}$  and  $\{z_k\}$  have the same iteration complexity  $\sqrt{\kappa} \log \frac{2C_0^{\text{NAG}}}{\mu\epsilon}$ . Since  $\{y_k\}$  is a convex combination of them, it also converges with the same complexity.

## F.1 Proof of Theorem F.1

For the convex combination  $y_k = \tau_y z_k + (1 - \tau_y) x_k$ , we can use the trick in Lemma 3 to obtain

$$\begin{aligned} f(y_k) - f(x^*) &\leq \frac{1 - \tau_y}{\tau_y} \langle \nabla f(y_k), x_k - y_k \rangle + \langle \nabla f(y_k), z_k - x^* \rangle - \frac{\mu}{2} \|y_k - x^*\|^2 \\ &= \frac{1 - \tau_y}{\tau_y} \langle \nabla f(y_k), x_k - y_k \rangle + \underbrace{\langle \nabla f(y_k), z_k - z_{k+1} \rangle}_{R_1} \\ &\quad + \underbrace{\langle \nabla f(y_k), z_{k+1} - x^* \rangle}_{R_2} - \frac{\mu}{2} \|y_k - x^*\|^2. \end{aligned} \tag{25}$$

For  $R_1$ , based on the  $L$ -smoothness, we have

$$f(x_{k+1}) - f(y_k) + \langle \nabla f(y_k), y_k - x_{k+1} \rangle \leq \frac{L}{2} \|x_{k+1} - y_k\|^2.$$

Note that  $y_k - x_{k+1} = \tau_x(z_k - z_{k+1}) + (\tau_y - \tau_x)(z_k - x_k)$ , we can arrange the above inequality as

$$\begin{aligned} f(x_{k+1}) - f(y_k) + \langle \nabla f(y_k), \tau_x(z_k - z_{k+1}) + (\tau_y - \tau_x)(z_k - x_k) \rangle &\leq \frac{L}{2} \|x_{k+1} - y_k\|^2, \\ R_1 &\leq \frac{L}{2\tau_x} \|x_{k+1} - y_k\|^2 + \frac{1}{\tau_x} (f(y_k) - f(x_{k+1})) - \frac{\tau_y - \tau_x}{\tau_x} \langle \nabla f(y_k), z_k - x_k \rangle. \end{aligned} \tag{26}$$

For  $R_2$ , based on the optimality condition of the 3rd step in Algorithm 5, which is for any  $u \in \mathbb{R}^d$ ,

$$\langle \nabla f(y_k) + \alpha(z_{k+1} - z_k) + \mu(z_{k+1} - y_k), u - z_{k+1} \rangle = 0,$$

we have (by choosing  $u = x^*$ ),

$$\begin{aligned} R_2 &= \alpha \langle z_{k+1} - z_k, x^* - z_{k+1} \rangle + \mu \langle z_{k+1} - y_k, x^* - z_{k+1} \rangle \\ &= \frac{\alpha}{2} (\|z_k - x^*\|^2 - \|z_{k+1} - x^*\|^2 - \|z_{k+1} - z_k\|^2) \\ &\quad + \frac{\mu}{2} (\|y_k - x^*\|^2 - \|z_{k+1} - x^*\|^2 - \|z_{k+1} - y_k\|^2). \end{aligned} \tag{27}$$

By upper bounding (25) using (26), (27), we can conclude that

$$\begin{aligned} f(y_k) - f(x^*) &\leq \frac{1 - \tau_x}{\tau_x} \langle \nabla f(y_k), x_k - y_k \rangle + \frac{1}{\tau_x} (f(y_k) - f(x_{k+1})) \\ &\quad + \frac{\alpha}{2} \left( \|z_k - x^*\|^2 - \left(1 + \frac{\mu}{\alpha}\right) \|z_{k+1} - x^*\|^2 \right) \\ &\quad + \frac{L}{2\tau_x} \|x_{k+1} - y_k\|^2 - \frac{\alpha}{2} \|z_{k+1} - z_k\|^2 - \frac{\mu}{2} \|z_{k+1} - y_k\|^2, \end{aligned}$$

Re-arrange the terms,

$$\begin{aligned} f(x_{k+1}) - f(x^*) &\leq (1 - \tau_x)(f(x_k) - f(x^*)) + \frac{\alpha\tau_x}{2} \left( \|z_k - x^*\|^2 - \left(1 + \frac{\mu}{\alpha}\right) \|z_{k+1} - x^*\|^2 \right) \\ &\quad + \frac{L}{2} \|x_{k+1} - y_k\|^2 - \frac{\alpha\tau_x}{2} \|z_{k+1} - z_k\|^2 - \frac{\mu\tau_x}{2} \|z_{k+1} - y_k\|^2. \end{aligned} \quad (28)$$

Note that the following relation holds:

$$x_{k+1} - y_k = \tau_x \left( \frac{(1 - \tau_x)\tau_y}{(1 - \tau_y)\tau_x} (z_{k+1} - z_k) + \frac{\tau_x - \tau_y}{(1 - \tau_y)\tau_x} (z_{k+1} - y_k) \right),$$

and thus if  $\tau_x \geq \tau_y$ , based on the convexity of  $\|\cdot\|^2$ , we have

$$\frac{L}{2} \|x_{k+1} - y_k\|^2 \leq \frac{L(1 - \tau_x)\tau_x\tau_y}{2(1 - \tau_y)} \|z_{k+1} - z_k\|^2 + \frac{L(\tau_x - \tau_y)\tau_x}{2(1 - \tau_y)} \|z_{k+1} - y_k\|^2.$$

Finally, suppose that the following relations hold

$$\begin{cases} \tau_x \geq \tau_y, \\ \alpha \geq \frac{L(1 - \tau_x)\tau_y}{1 - \tau_y}, \\ \mu \geq \frac{L(\tau_x - \tau_y)}{1 - \tau_y}, \\ \left(1 + \frac{\mu}{\alpha}\right)(1 - \tau_x) \leq 1, \end{cases}$$

we can arrange (28) as

$$\begin{aligned} &f(x_{k+1}) - f(x^*) + \frac{\alpha\tau_x}{2} \left(1 + \frac{\mu}{\alpha}\right) \|z_{k+1} - x^*\|^2 \\ &\leq \left(1 + \frac{\mu}{\alpha}\right)^{-1} \left( f(x_k) - f(x^*) + \frac{\alpha\tau_x}{2} \left(1 + \frac{\mu}{\alpha}\right) \|z_k - x^*\|^2 \right), \end{aligned}$$

which completes the proof.
